# Supplementary material
Source: publisher figshare collection journal article supplement (https://acs.figshare.com/ndownloader/files/3621780)
Supplement: Supplementary file 1 [file 3621780]

## Charge-State Control of $\text{Mn}^{2+}$ Spin Relaxation Dynamics in Colloidal $n$ -type $\text{Zn}_{1-x}\text{Mn}_x\text{O}$ Nanocrystals

Alina M. Schimpf, Jeffrey D. Rinehart,<sup>†</sup> Stefan T. Ochsenbein,<sup>††</sup> and Daniel R. Gamelin<sup>\*</sup>

Department of Chemistry, University of Washington, Seattle, WA 98195-1700, USA

<sup>\*</sup>Electronic address: [Gamelin@chem.washington.edu](mailto:Gamelin@chem.washington.edu)

<sup>†</sup>Present address: Department of Chemistry and Biochemistry, University of California in San Diego, La Jolla, CA 92013, USA

<sup>††</sup>Present address: Laboratory for Neutron Scattering and Imaging, Paul Scherrer Institut, CH-5232 Villigen PSI, Switzerland

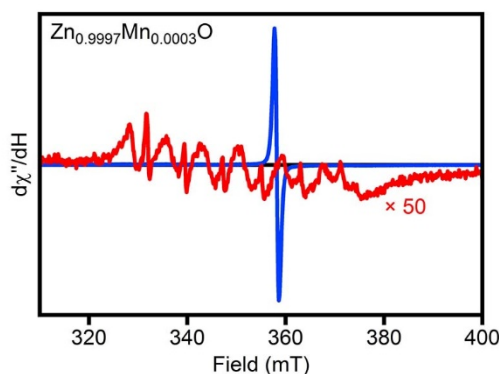

**Figure S1.** Room-temperature X-band CW EPR spectra of as-prepared (red) and maximally reduced (blue) colloidal  $d = 3.7$  nm  $\text{Zn}_{0.9997}\text{Mn}_{0.0003}\text{O}$  nanocrystals.

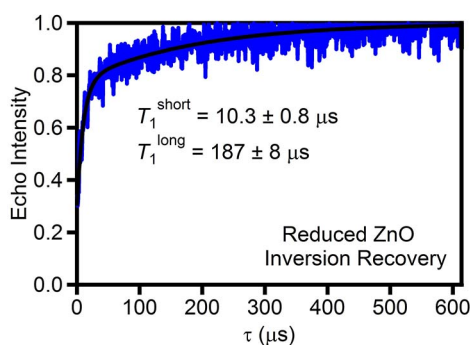

**Figure S2.** 4.5 K inversion recovery measured on photochemically reduced ( $\langle n \rangle \sim 1$ ) ZnO nanocrystals. Data were fit to equation S1 and the short component ( $\sim 67\%$  of total amplitude) was used for  $T_1^e$ . Even though  $T_1^e$  likely decreases with increasing  $\langle n \rangle$ , this value of  $T_1^e$  (or  $k_{\text{eSLR}}$ ) was used in the model calculations for all nanocrystal reduction levels (*i.e.*, for all  $n_e$ ). Because the model already overestimates the decrease in  $T_1^{\text{Mn}}$  at  $n_e > 1$ , this approximation is not the source of the disagreement between model and experiment in Figure 4 of the main text.

$$I(\tau) = 1 - A_{\text{short}} \exp(-\tau / T_1^{\text{short}}) - A_{\text{long}} \exp(-\tau / T_1^{\text{long}}) \quad (\text{S1})$$

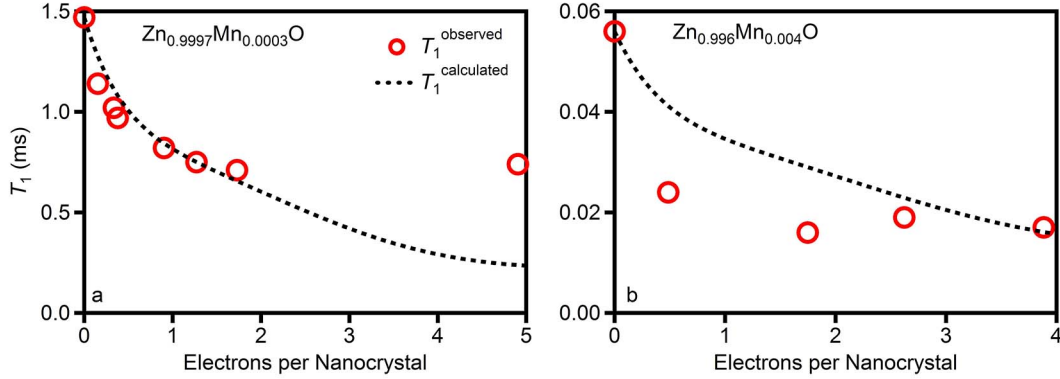

**Figure S3.** Experimental (circles) and calculated (dashed line)  $T_1$  values plotted versus the average number of conduction-band electrons for (a)  $d = 3.7$  nm  $\text{Zn}_{0.9997}\text{Mn}_{0.0003}\text{O}$  and (b)  $d = 3.7$  nm  $\text{Zn}_{0.996}\text{Mn}_{0.004}\text{O}$  nanocrystals. Calculated values were obtained using equation S2 with  $T_1^{\text{Mn}} = T_1^{\text{as-prepared}}$  and  $T_1^{\text{e}} = 10 \mu\text{s}$ . This model explicitly accounts for low- and intermediate-spin configurations expected from an orbital filling scheme. These calculations are intended for illustration purposes only, and it is unknown whether such low- and intermediate-spin configurations actually occur.

$$T_1^{\text{observed}} = \sum_{n_e=0}^1 \frac{P(n_e)}{k_{\text{MnSLR}} + n_e k_{\text{eSLR}}} + \sum_{n_e=2}^5 \frac{P(n_e)}{k_{\text{MnSLR}} + (n_e - 2)k_{\text{eSLR}}} + \sum_{n_e=6}^7 \frac{P(n_e)}{k_{\text{MnSLR}} + (8 - n_e)k_{\text{eSLR}}} + \sum_{n_e=8}^{10} \frac{P(n_e)}{k_{\text{MnSLR}} + (n_e - 8)k_{\text{eSLR}}} \quad (\text{S2a})$$

$$P(n_e) = \frac{\langle n \rangle^{n_e} e^{-\langle n \rangle}}{n_e!} \quad (\text{S2b})$$
